# Supplementary material
Source: publisher figshare collection journal article supplement (https://gsapubs.figshare.com/ndownloader/files/22756859)
Supplement: Supplementary file 1 [file 22756859]

## Data Repository Item 2009050

| Formation                 | Description of deposits                                                                        | Outcrop description                                                                    | Grid reference                   | Figure reference           |
|---------------------------|------------------------------------------------------------------------------------------------|----------------------------------------------------------------------------------------|----------------------------------|----------------------------|
| Poris                     | Ash pellet layers and thin ignimbrite veneers of belonging to ignimbrites 1 and 3.             | Low hills 150 m WNW of bridge on TF-625 outside Poris De Abona                         | 28°09'54.06" N<br>16°26'13.07" W | Fig. 3A;<br>Fig. 4B        |
| Poris                     | Stacked ash pellet layers belonging to ignimbrites 1-4.                                        | Quarry in Güimar valley on north side of TF-61 immediately west of junction with TF-1. | 28°16'23.00" N<br>16°23'05.55" W | Fig. 3L                    |
| Poris                     | Valley filling ignimbrite and overbank deposits of ignimbrites 1, 3 and 4.                     | Large amount of exposure in Magua valley.                                              | 28°11'19.62" N<br>16°26'39.46" W | Fig. 4A and 4B;<br>Fig. 9. |
| Caldera del Rey tuff ring | Sequence of thin ash aggregate-bearing ignimbrites and associated co-ignimbrite fall deposits. | Cutting through south side of tuff ring.                                               | 28°04'21.11" N<br>16°43'09.40" W | Fig. 3K;<br>Fig. 4C,       |
| La Caleta                 | Stacked sequence of ignimbrites and pellet fall layers of ignimbrites 4-7.                     | Intermittent exposure along track leading SW along coast from Cueva Honda.             | 28°05'35.40" N<br>16°29'20.17" W | Fig. 3E;<br>Fig. 4D        |
| Fasnia                    | Basal pellet fall layer.                                                                       | Exposed in roadcuts at base of Fasnia Formation on either side of TF-617.              | 28°14'56.12" N<br>16°25'05.23" W | Fig. 10                    |

Data repository item 1. Locations of key outcrops of ash aggregate-bearing pyroclastic layers in the Bandas del Sur.
